# Supplementary material
Source: Springer Nature journal article supplement (https://www.springermedizin.de/resource/supplementary/12889_2010_2652_MOESM2_ESM.pdf/9486890)

**Contextual conditions**

**Actual intervention**

**Actual outcomes**

**Mechanism**

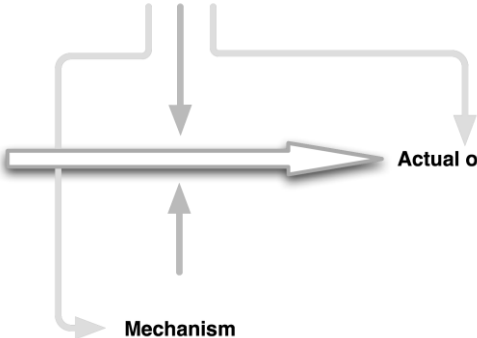

Supplement: MOESM2 [file 9486890]
